# Supplementary material
Source: PubMed Central journal article supplement (PMC3148317)
Supplement: NIHMS310243-supplement-1_si_001.pdf [file NIHMS310243-supplement-1_si_001.pdf]

**A Steroid-Conjugated Magnetic Resonance Probe Enhances Contrast in Progesterone  
Receptor Expressing Organs and Tumors *In Vivo***

Preeti A. Sukerkar<sup>1</sup>, Keith W. MacRenaris<sup>1</sup>, Thomas J. Meade<sup>1\*</sup>, Joanna E. Burdette<sup>2\*</sup>

<sup>1</sup>Department of Chemistry, Department of Molecular Biosciences, Department of Neurobiology and Physiology, and Department of Radiology, Northwestern University, Evanston, Illinois, 60201

<sup>2</sup>Department of Medicinal Chemistry and Pharmacognosy, University of Illinois at Chicago, Chicago, 60612

\*Corresponding Authors:

Thomas J. Meade, PhD

Department of Chemistry, Molecular Biosciences, Neurobiology and Physiology, and Radiology  
Northwestern University, 2145 Sheridan Road, Evanston, IL 60208.

E-mail: tmeade@northwestern.edu

Joanna E. Burdette, PhD

College of Pharmacy

Department of Medicinal Chemistry and Pharmacognosy

University of Illinois at Chicago

900 South Ashland, Chicago, IL 60612

Email: joannab@uic.edu

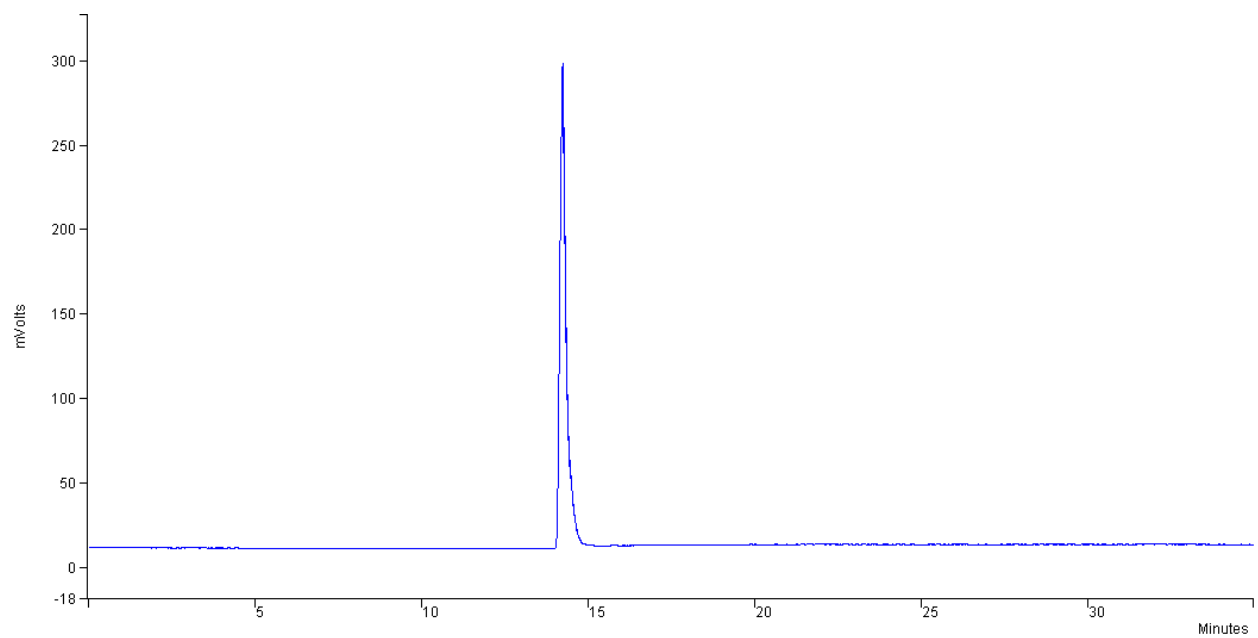

**Figure S1.** Analytical HPLC trace of purified Gd-DO3A.

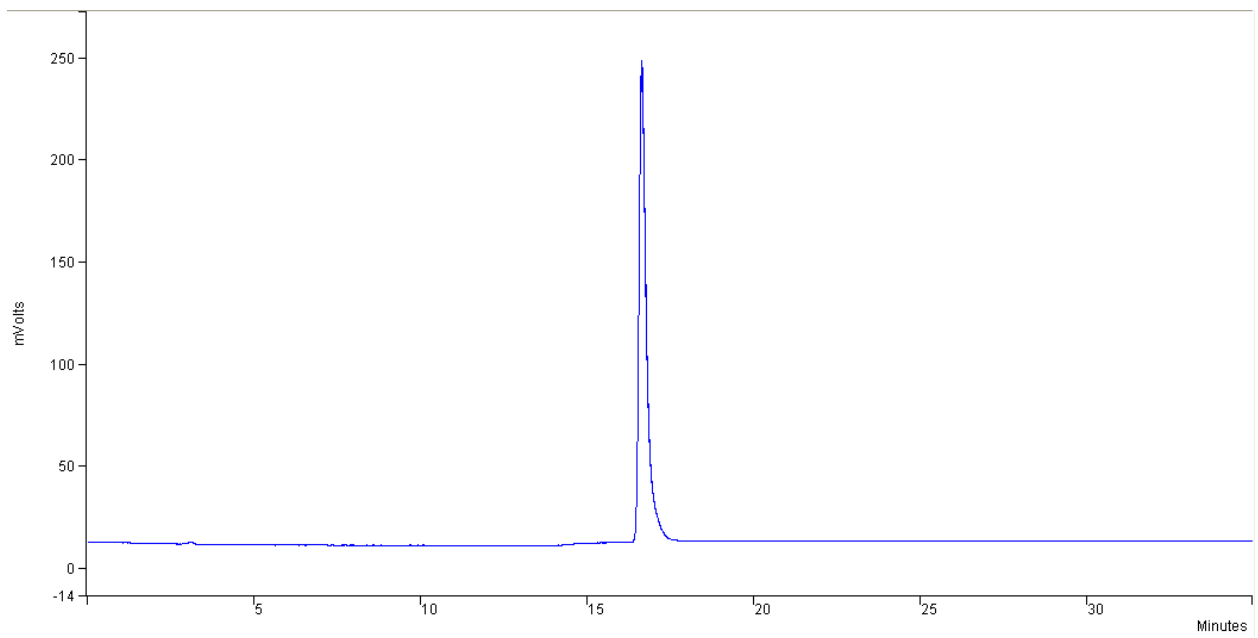

**Figure S2.** Analytical HPLC trace of purified Gd-Hexyl-DO3A.

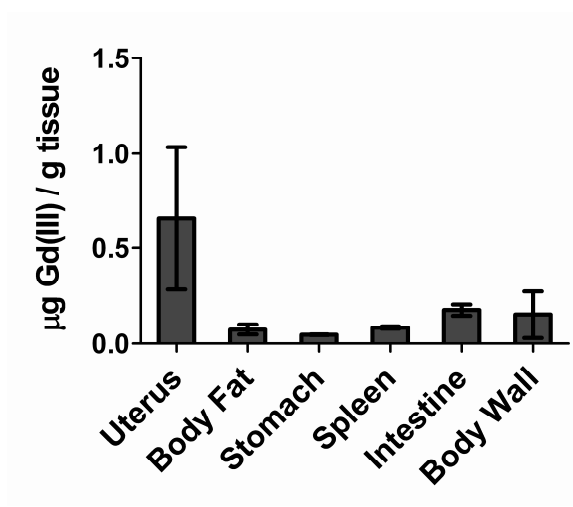

**Figure S3.** Accumulation of Gd(III) in various abdominal tissues after injection of ProGlo. Gd(III) levels in these tissues were lower than in the uterus.
